# Supplementary material
Source: Springer Nature journal article supplement (https://www.springermedizin.de/resource/supplementary/12913_2008_833_MOESM13_ESM.pdf/9535680)

original cpw data

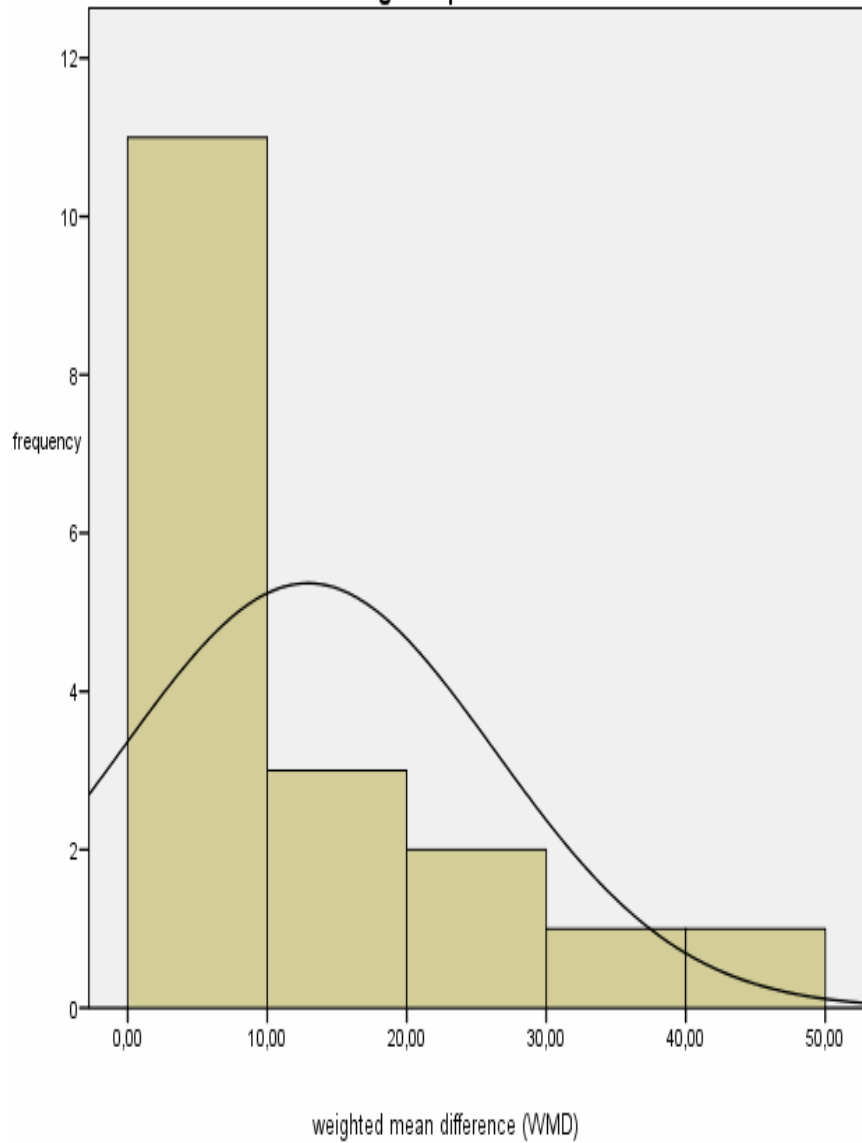

LN transformed data

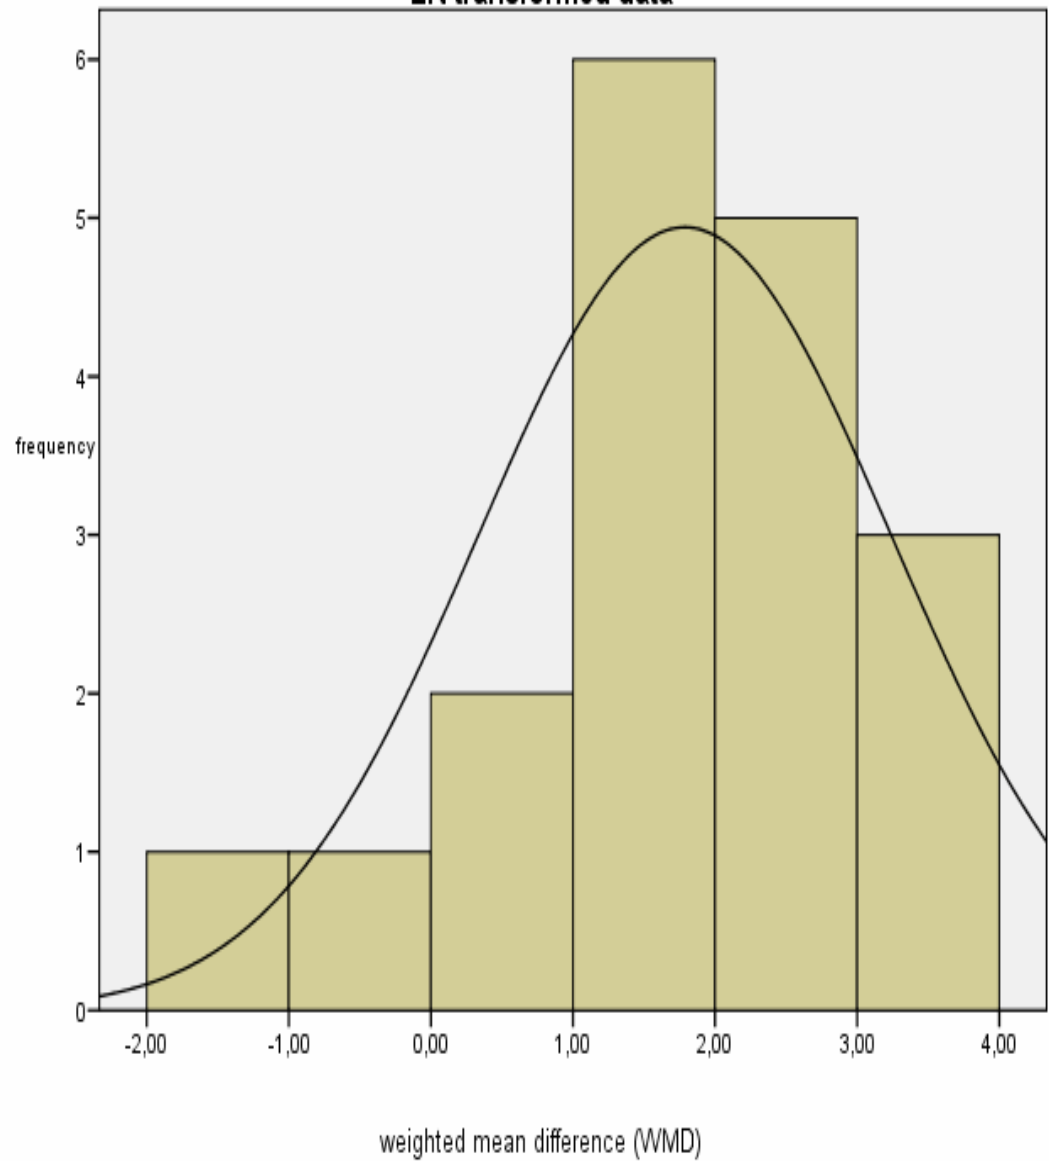

Supplement: MOESM13 [file 9535680]
